# Supplementary material
Source: publisher figshare collection journal article supplement (https://karger.figshare.com/ndownloader/files/28961826)
Supplement: Supplementary file 1 [file 28961826]

## Sheet: supplementary1
Supplementary table 1 Comparison net fluid balance between non-survivor and survivor.
Time	Dead (n=108)	Alive (n=39)	p-value
	Mean±SD	Mean±SD
Day 1	4027.90±2945.07	2656.51±3421.46	0.020a
Day 2	4119.84±3090.98	2216.57±4360.27	0.014a
Day 3	4533.85±3615.53	2082.19±5007.64	0.011a
Day 4	4199.23±3582.38	1316.21±5685.44	0.013a
Day 5	3604.83±4016.33	1743.48±6139.97	0.189a
Net fluid balance , Mean (95%CI)	175.12	-353.71	0.012b
	(-78.08 to 428.33)	(-681.48 to -25.94)
aStudent's t-test
bLinear mixed models

## Sheet: supplementary2
Supplementary table 2 Comparison pd fluid balance between non-survivor and survivor.
Time	Dead (n=108)	Alive (n=39)	p-value
	Mean±SD	Mean±SD
Day 1	396.18±1200.58	1016.15±1499.73	0.012a
Day 2	1707.38±2044.95	2658.14±1965.31	0.028a
Day 3	3061.64±2703.92	4066.41±2886.64	0.111a
Day 4	4126.15±3396.71	5764.31±3466.82	0.056a
Day 5	5797.33±3944.10	7735.22±3782.94	0.077a
PD fluid balance , Mean (95%CI)	914.38	1184.57	0.133b
	(704.01 to 1124.74)	(894.86 to 1474.28)
aStudent's t-test
bLinear mixed models
